# Supplementary material for: Random copolymer of styrene and diene derivatives via anionic living polymerization followed by intramolecular Friedel–Crafts cyclization for high-performance thermoplastics
Source: Royal Society of Chemistry journal article supplement (doi:10.1039/c1py00433f), 2011-11-09
Supplement: c1py00433f.pdf [file c1py00433f.pdf]

## Supplementary Information

### Random copolymer of styrene and diene derivatives via anionic living polymerization followed by intramolecular Friedel-Crafts cyclization for high-performance thermoplastics

Atsuhiko Nakahara,<sup>†,‡</sup> Kotaro Satoh<sup>†</sup> and Masami Kamigaito<sup>\*,†</sup>

<sup>†</sup>*Department of Applied Chemistry, Graduate School of Engineering, Nagoya University, Furo-cho, Chikusa-ku, Nagoya 464-8603, Japan, and* <sup>‡</sup>*Kurashiki Research Laboratories, Kuraray Co. Ltd, 2045-1, Sakazu, Kurashiki, Okayama 710-0801, Japan*

#### Contents:

**Table S1.** Copolymers (*r*-SIR) of styrene (St) and isoprene (Ip) prepared by anionic living polymerization.

**Figure S1.** Size-exclusion chromatograms of cyclized *r*-SIR obtained with CF<sub>3</sub>SO<sub>3</sub>H in cyclohexane for 1 h at 23 °C at various concentrations of *r*-SIR.

**Scheme S1.** Postulated reactions during cationic cyclization of styrene-diene copolymers.

**Table S1. Copolymers (*r*-SIR) of styrene (St) and isoprene (Ip) prepared by anionic living polymerization<sup>a</sup>**

| Code | <i>r</i> -SIR   | $F_{st}$ ,<br>mol% <sup>b</sup> | $M_n^c$ | $M_w/M_n^c$ | Microstructure in Ip, % <sup>b</sup> |     |     | $T_g$ , °C <sup>d</sup> |
|------|-----------------|---------------------------------|---------|-------------|--------------------------------------|-----|-----|-------------------------|
|      |                 |                                 |         |             | 1,4                                  | 1,2 | 3,4 |                         |
| 1    | <i>r</i> -SIR-1 | 48                              | 119,400 | 1.03        | 68                                   | 1   | 31  | 16                      |
| 2    | <i>r</i> -SIR-2 | 48                              | 112,400 | 1.04        | 67                                   | 1   | 32  | 20                      |
| 3    | <i>r</i> -SIR-3 | 37                              | 119,200 | 1.10        | 77                                   | 1   | 22  | -1                      |
| 4    | <i>r</i> -SIR-4 | 47                              | 128,400 | 1.05        | 67                                   | 1   | 32  | 19                      |

<sup>a</sup>Copolymerization was initiated by adding solutions of premixed St/Ip mixture (St: 1.2 mol; Ip: 1.2 mol) at 3.3mL/min by syringe pump into a *sec*-butyl lithium solution containing cyclohexane (840 mL), tetrahydrofuran (6.0 mmol), and *sec*-butyl lithium (2.0 mmol) at 40 °C.

<sup>b</sup>Determined by <sup>1</sup>H NMR. <sup>c</sup>The number-average molecular weight ( $M_n$ ) and distribution ( $M_w/M_n$ ) were determined by size-exclusion chromatography against PSt standards. <sup>d</sup>The glass transition temperature ( $T_g$ ) was determined by differential scanning calorimetry.

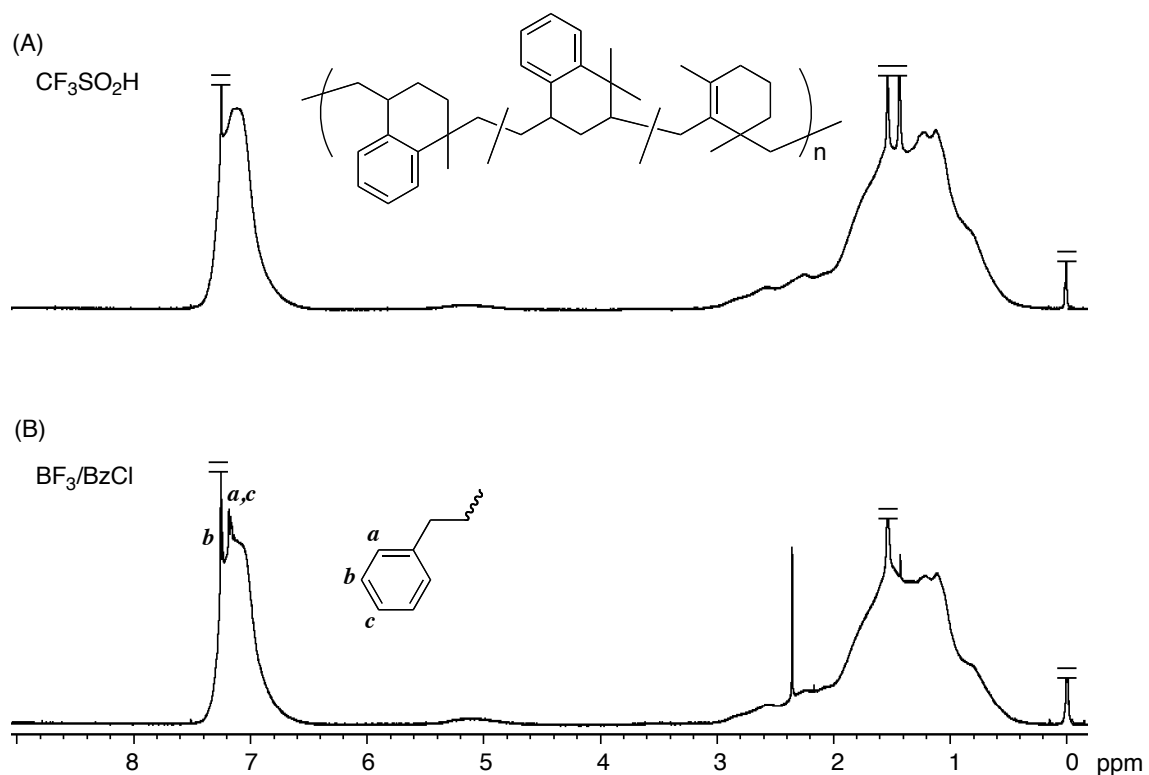

**Figure S1.**  $^1\text{H}$  NMR spectra for the cyclization of *r*-SIR ( $F_{\text{st}} = 48\%$ ,  $M_n = 128,400$ ,  $M_w/M_n = 1.05$ ) with (A)  $\text{CF}_3\text{SO}_3\text{H}$  ( $M_n = 76,500$ ,  $M_w/M_n = 1.55$ ; see also Table 3 entry 1 in the manuscript) and (B)  $\text{BF}_3 \cdot 2\text{AcOH}/\text{BzCl}$  ( $M_n = 86,900$ ,  $M_w/M_n = 1.14$ ; see also Table 2 entry 13 in the manuscript).

## 1. Intramolecular Cyclization Reactions

### 1-1. Between Adjacent Alternating Styrene-1,3-Diene Units (Friedel-Crafts Cyclization)

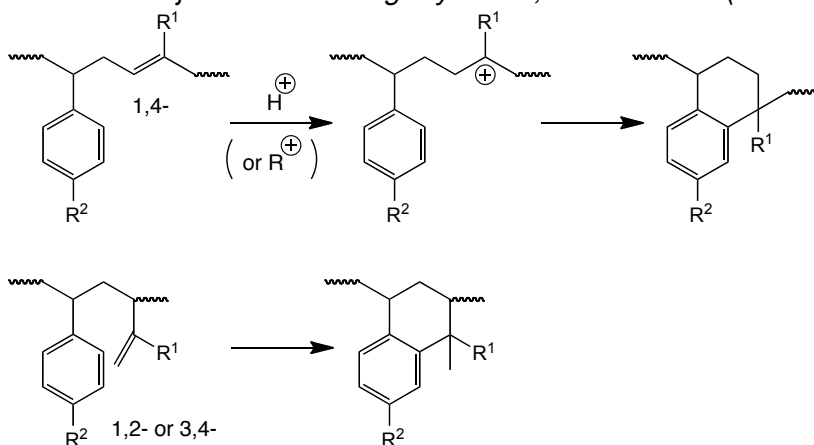

### 1-2. Between Consecutive 1,3-Diene Units

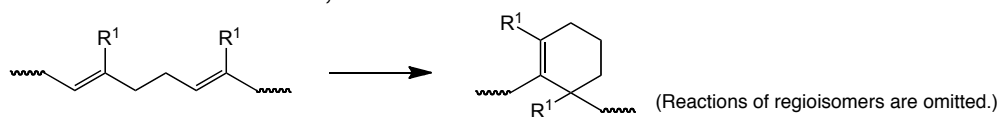

## 2. Side Reactions

### 2-1. Intermolecular Friedel-Crafts Reaction (Linking Reaction)

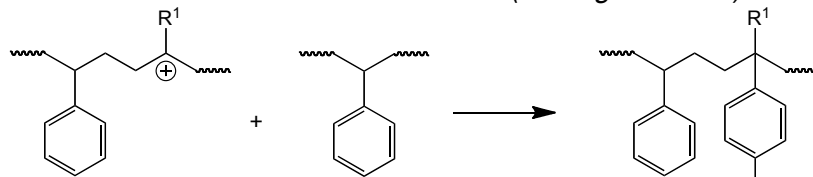

### 2-2. Long-Range Intramolecular Friedel-Crafts Reaction (Macro-cyclization)

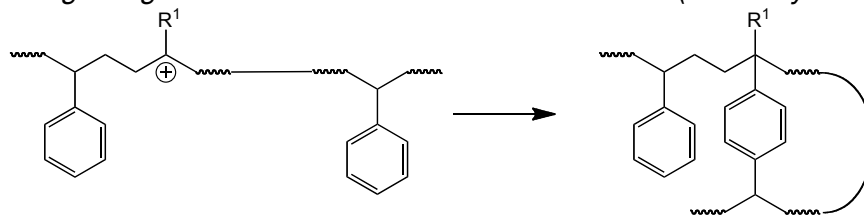

### 2-3. Main Chain Scission ( $\beta$ -Cleavage)

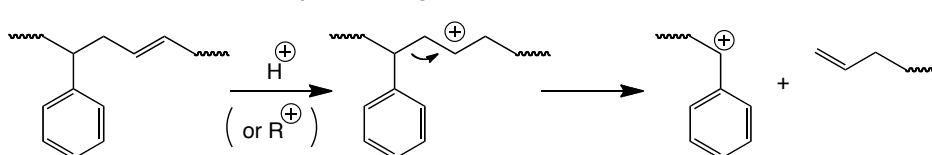

**Figure S2.** Postulated reactions during cationic cyclization of styrene-diene copolymers.
